# Supplementary material for: Formaldehyde evolution in U.S. wildfire plumes during FIREX-AQ
Source: Copernicus journal article supplement (doi:10.5194/acp-2021-389), 2021-05-31
Supplement: Supplementary file 1 [file acp-2021-389-supplement.pdf]

Supplementary material:

Table S1. VOC species used in F0AM box model to calculate OH reactivity

| Alkanes                 | Alkenes/Alkynes   | Aromatics        | Oxygenated       |
|-------------------------|-------------------|------------------|------------------|
| Methane                 | Ethyne            | Benzene          | Formaldehyde     |
| Ethane                  | Ethene            | Toluene          | Methanol         |
| Propane                 | Propene           | Ethylbenzene     | Acetaldehyde     |
| n-Butane                | 1-Butene          | o-Xylene         | Acetone          |
| i-Butane                | cis-2-Butene      | m-Xylene         | Propanal         |
| n-Pentane               | trans-2-Butene    | p-Xylene         | MVK              |
| i-Pentane               | i-Butene          | Furan            | Methacrolein     |
| n-Hexane                | 1-Pentene         | Furfural         | Hydroxyacetone   |
| 2-Methylpentane         | cis-2-Pentene     | 2-Methylfuran    | Glycolaldehyde   |
| 3-Methylpentane         | trans-2-Pentene   | 3-Methylfuran    | Formic Acid      |
| n-Heptane               | 2-Methyl-1-butene | Dimethylfuran    | Acrolein         |
| 2,2-Dimethyl-<br>butane | 3-Methyl-1-butene | 5-Methylfurfural | Ethanol          |
| n-Octane                | Isoprene          | Catechol         | Glyoxal          |
| n-Nonane                | $\alpha$ -Pinene  | Guaiacol         | Methyglyoxal     |
| n-Decane                | Limonene          | Creosols         | MEK              |
| Cyclohexane             | $\beta$ -Pinene   | Syringol         | Butanal          |
|                         |                   | Furanone         | 2-Methylpropanal |
|                         |                   | Phenol           | Methyl Acetate   |
|                         |                   | Cresol           | Ethyl Formate    |

|  |              |                             |
|--|--------------|-----------------------------|
|  | Benzaldehyde | 2,3-Butanedione             |
|  | Styrene      | 2-Methyl-3-buten-2-ol (MBO) |

Table S2. Wildfire plume selection conditions. Conditions to select the plumes suitable for analyzing the evolution of HCHO in wildfires based on iWAS merge data. For example, the 0807 Williams Flats plume 2 was not selected due to lack of iWAS data for most of the sampling plume and thus there were not enough data for appropriate VOC decay. The plumes in shaded grey area meet our selection conditions and are used in our analysis.

| Wildfire<br>circuits | plumes              | sampling | Lagrangian<br>sampling<br>patterns<br>(transects >3) | Elevated<br>concentrations above<br>background (max 1s<br>HCHO > 600 ppt) | Appropriate<br>ratios<br>decay with physical age<br>( $r^2 \geq 0.57$ ) | VOC | Sufficient<br>data<br>with appropriate<br>VOC decay (data<br>numbers $\geq 8$ ) |
|----------------------|---------------------|----------|------------------------------------------------------|---------------------------------------------------------------------------|-------------------------------------------------------------------------|-----|---------------------------------------------------------------------------------|
| 20190724             | Sheep               |          | ✓                                                    | ✓                                                                         | ✓                                                                       |     | ×                                                                               |
| 20190724             | Shady               |          | ×                                                    | ✓                                                                         | ✓                                                                       |     | ×                                                                               |
| 20190725             | Shady 1             |          | ✓                                                    | ✓                                                                         | ✓                                                                       |     | ×                                                                               |
| 20190725             | Shady 2             |          | ✓                                                    | ✓                                                                         | ✓                                                                       |     | ✓                                                                               |
| 20190725             | Shady 3             |          | ✓                                                    | ✓                                                                         | ✓                                                                       |     | ×                                                                               |
| 20190729             | North Hill          |          | ✓                                                    | ✓                                                                         | ✓                                                                       |     | ✓                                                                               |
| 20190729             | Tucker              |          | ✓                                                    | ✓                                                                         | ×                                                                       |     | ✓                                                                               |
| 20190730             | Tucker              |          | ✓                                                    | ×                                                                         | ✓                                                                       |     | ✓                                                                               |
| 20190730             | Lefthand            |          | ✓                                                    | ✓                                                                         | ×                                                                       |     | ✓                                                                               |
| 20190802             | RidgeTop            |          | ×                                                    | ✓                                                                         | ✓                                                                       |     | ✓                                                                               |
| 20190802             | Mica and Lick Creek |          | ✓                                                    | ✓                                                                         | ✓                                                                       |     | ✓                                                                               |

|                              |   |   |   |   |
|------------------------------|---|---|---|---|
| 20190803 Williams Flats 1    | √ | √ | √ | √ |
| 20190803 Williams Flats 2    | √ | √ | √ | √ |
| 20190806 Williams Flats      | √ | √ | √ | √ |
| 20190806 Horsefly            | √ | √ | × | √ |
| 20190807 Williams Flats 1    | √ | √ | √ | √ |
| 20190807 Williams Flats 2    | √ | √ | × | × |
| 20190808 Williams Flats aged | × | √ | × | √ |
| 20190808 Williams Flats      | × | √ | √ | √ |
| PyroCb                       |   |   |   |   |
| 20190812 Castle1             | √ | √ | √ | √ |
| 20190812 Castle 2 nighttime  | √ | √ | √ | √ |
| 20190813 Castle1             | √ | √ | × | √ |
| 20190813 Castle 2            | √ | √ | √ | √ |
| 20190815 Sheridan            | × | √ | × | √ |
| 20190816 Sheridan            | √ | √ | √ | √ |
| 20190830 Blackwater River    | √ | √ | √ | √ |
| Forest                       |   |   |   |   |

√ : meet the condition.

×

 : does not meet the condition.

Table S3. Mean and standard deviation of nHCHO production and loss rates of the 12 plumes.

| Plumes   | nHCHO production rate (mean±std, ppt/ppb/hr) | nHCHO loss rate (mean±std, ppt/ppb/hr) |
|----------|----------------------------------------------|----------------------------------------|
| 20190725 | 2.8±2.0                                      | 4.1±0.7                                |
| 20190729 | 3.4±4.5                                      | 2.5±0.5                                |
| 20190802 | 6.5±2.5                                      | 4.7±0.1                                |
| 20190803 | 0.6±1.9                                      | 3.1±1.0                                |
| 20190803 | 1.4±0.8                                      | 1.2±0.1                                |
| 20190806 | 4.0±4.9                                      | 6.1±0.6                                |
| 20190807 | 2.3±0.7                                      | 1.5±0.3                                |
| 20190812 | 2.6±0.8                                      | 2.1±0.8                                |

|           |          |          |
|-----------|----------|----------|
| 20190812N | 0.0±0.2  | -0.2±0.0 |
| 20190813  | 2.6±1.7  | 0.6±0.0  |
| 20190816  | 1.6±2.2  | 0.8±0.4  |
| 20190830  | 14.1±5.2 | 10.0±0.4 |

Table S4. Mean and standard deviation of O<sub>3</sub> concentrations and the uncertainty in OH

estimation due to O<sub>3</sub> variation of the 12 plumes

| Plumes            | O <sub>3</sub> mixing ratios (mean±std, ppb) | OH estimation uncertainty due to O <sub>3</sub> variation (molec cm <sup>-3</sup> ) |
|-------------------|----------------------------------------------|-------------------------------------------------------------------------------------|
| 20190725          | 32.0±5.7                                     | 0.31×10 <sup>6</sup>                                                                |
| 20190729          | 51.2±1.6                                     | 0.15×10 <sup>6</sup>                                                                |
| 20190802          | 55.5±6.7                                     | 0.51×10 <sup>6</sup>                                                                |
| 20190803          | 88.2±18.6                                    | 1.51×10 <sup>6</sup>                                                                |
| 20190803          | 43.7±19.2                                    | 1.55×10 <sup>6</sup>                                                                |
| 20190806          | 58.3±4.3                                     | 0.36×10 <sup>6</sup>                                                                |
| 20190807          | 60.4±23.5                                    | 1.42×10 <sup>6</sup>                                                                |
| 20190812          | 50.6±2.3                                     | 0.14×10 <sup>6</sup>                                                                |
| 20190812nighttime | 47.5±0.8                                     | 0.05×10 <sup>6</sup>                                                                |
| 20190813          | 56.1±4.4                                     | 0.26×10 <sup>6</sup>                                                                |
| 20190816          | 63.1±6.5                                     | 0.34×10 <sup>6</sup>                                                                |
| 20190830          | 74.4±17.3                                    | 2.04 ×10 <sup>6</sup>                                                               |

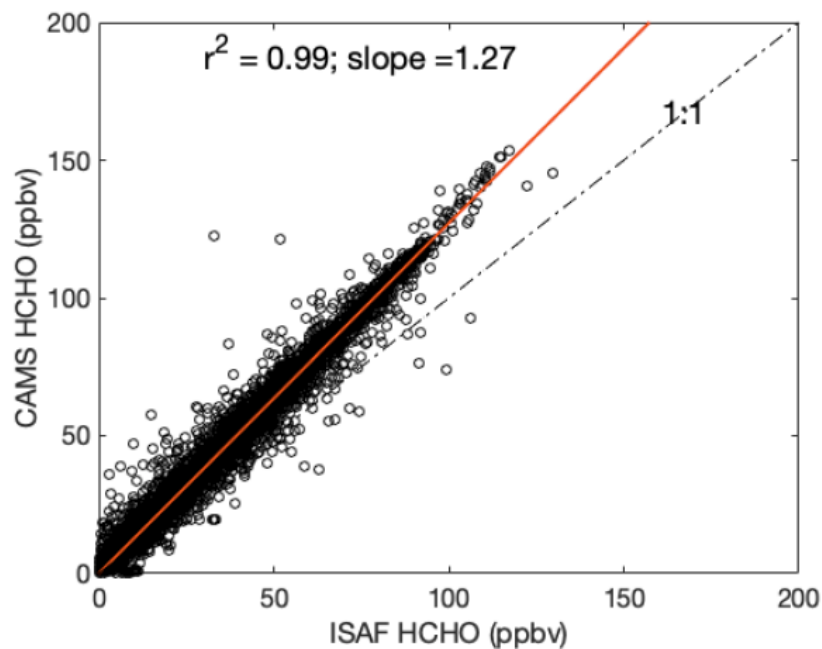

Figure S1. A scatter plot of 1-s average CAMS vs. ISAF HCHO measurements for western US wildfire flights and one eastern US wildfire flight during FIREX-AQ. CAMS HCHO measurements well correlates with ISAF HCHO measurements with a slope of 1.27 and an  $r^2 = 0.99$ .

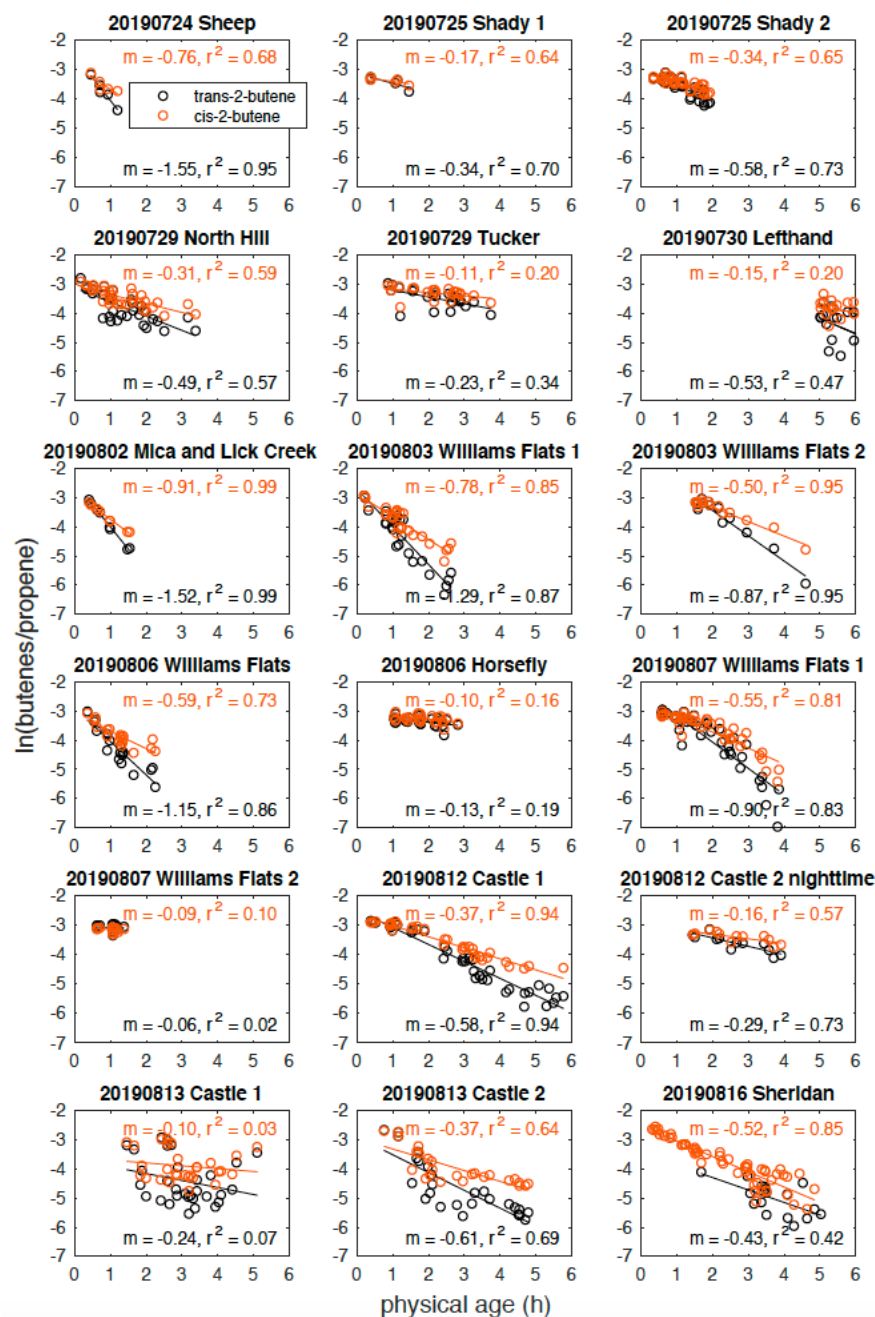

Figure S2. Natural logarithms of cis-2-butene to propene ratios (red circles) and trans-2-butene to propene ratios (black circles) vs. physical age for 18 western US wildfire plumes that met selection conditions a) and b) in Sect. 2.3. 25 July Shady 3 plume was not plotted because of the unavailability of iWAS data. The slopes of the linear fits to the data (m, shown on the plots) reflect the oxidation by OH and O<sub>3</sub> and are used to calculate the average OH concentrations with average

O<sub>3</sub> concentrations and reaction coefficients. The eastern US wildfire plume not plotted here is displayed in Fig. 2.

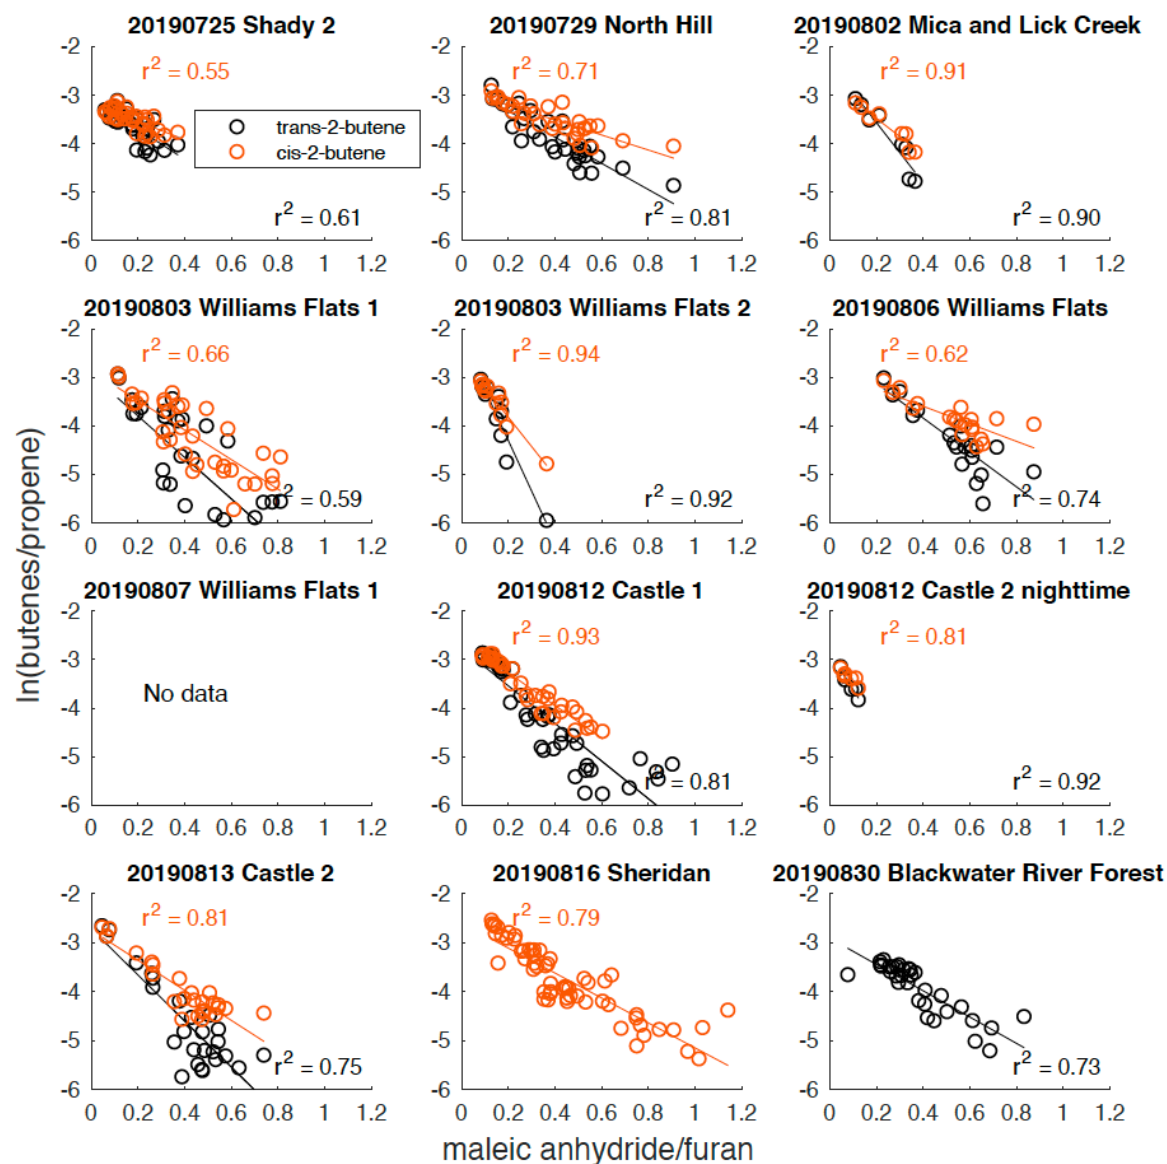

Figure S3 A scatter plot of  $\ln(\text{trans-2-butene/propene})$  and  $\ln(\text{cis-2-butene/propene})$  vs. maleic anhydride/furan for the plumes analyzed. No PTRMS data are available for 07 August plume.

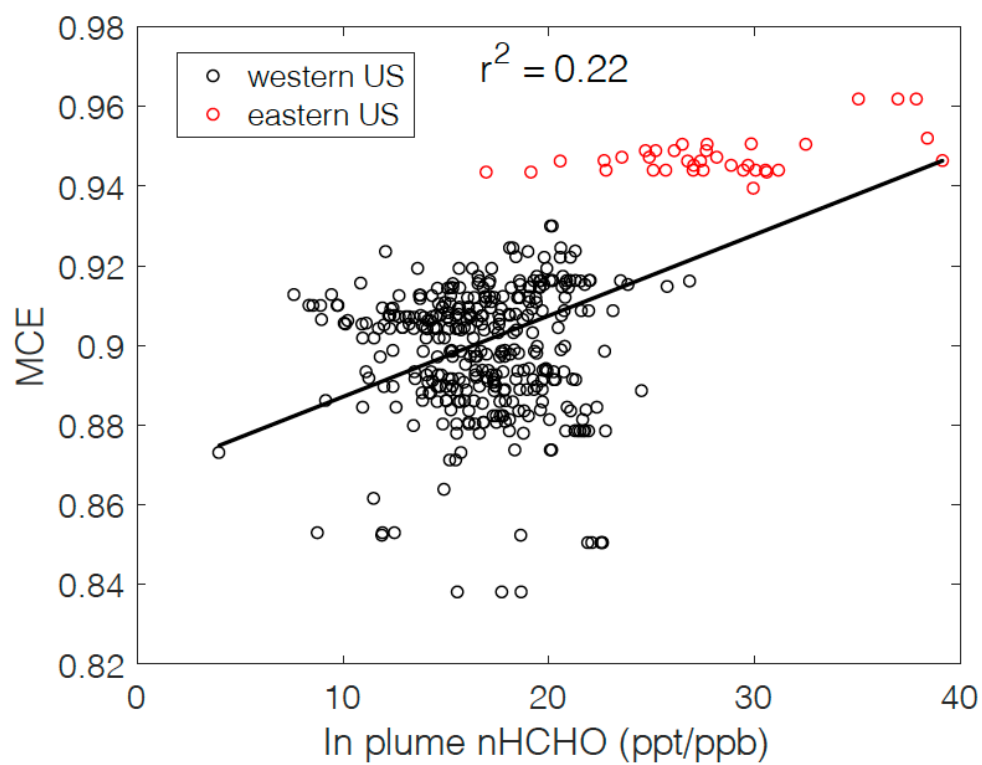

Figure S4. A scatter plot of nHCHO vs. modified combustion efficiency (MCE) for the 12 plumes analyzed. The slightly positive correlation is due to the eastern US wildfire plume that had higher MCE and in plume nHCHO than western US wildfire plumes.



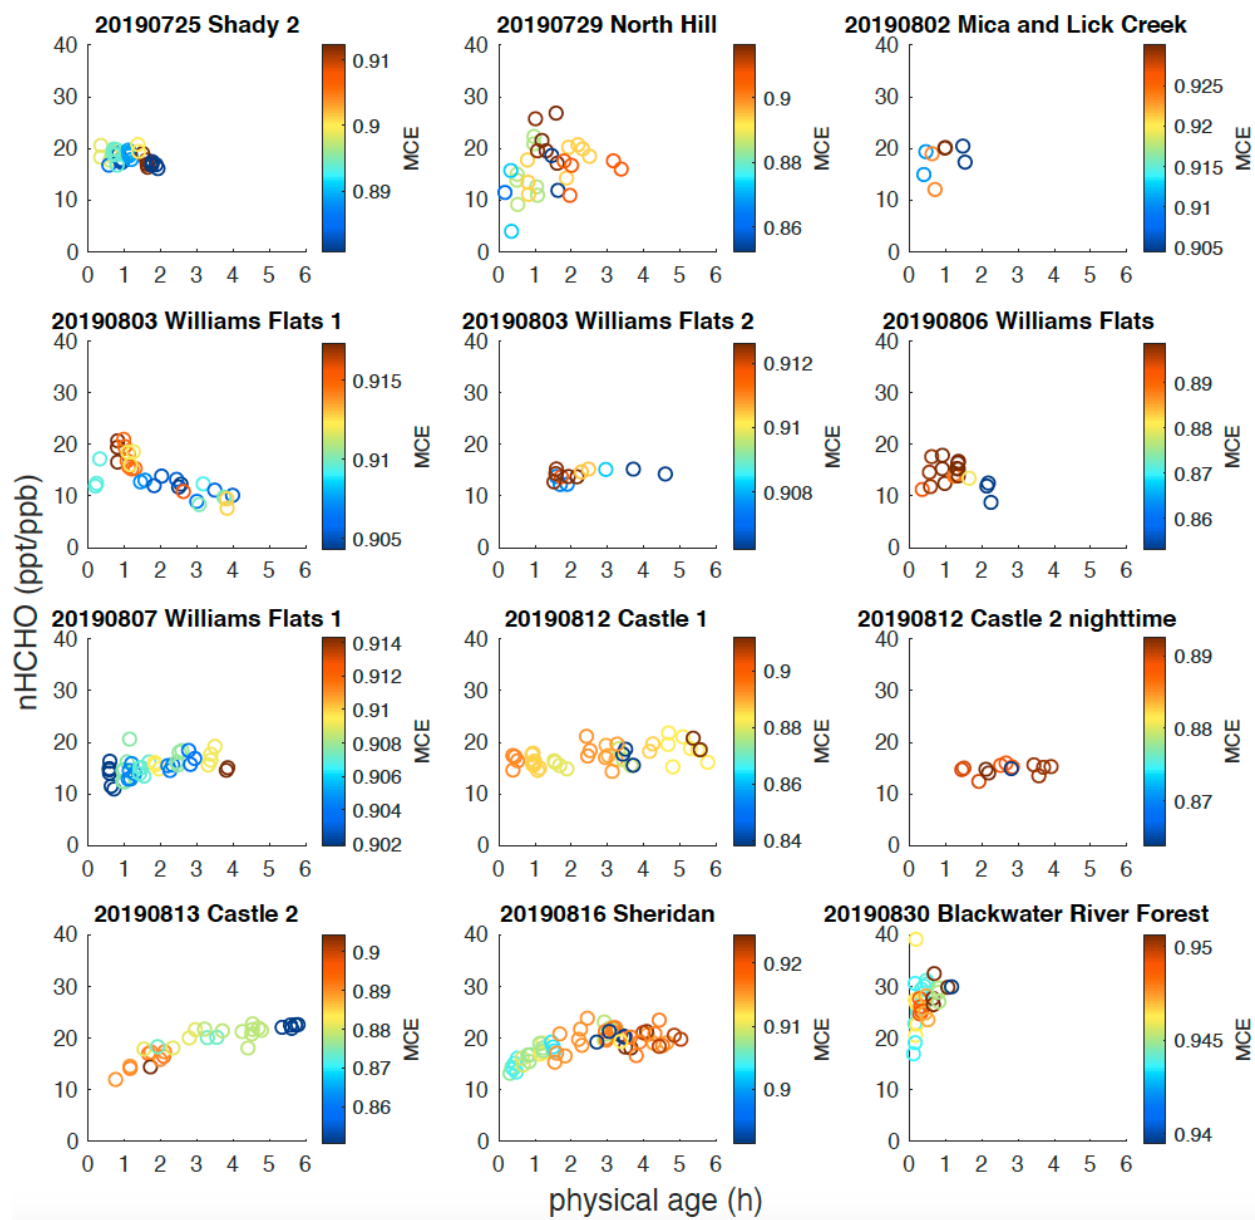

Figure S5. Trends of nHCHO for the 12 plumes analyzed color-coded by MCE.

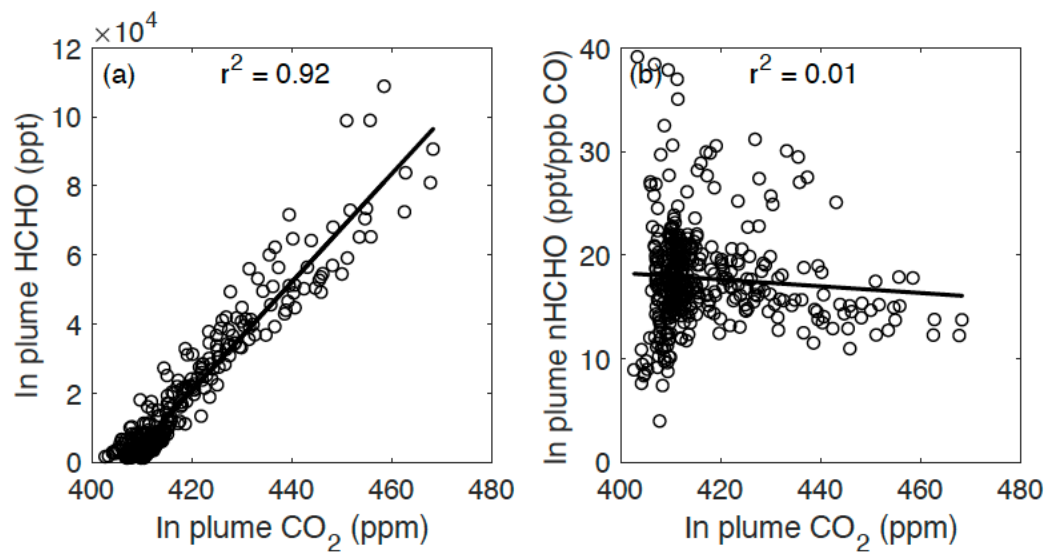

Figure S6. (a) A scatter plot of in plume HCHO vs. CO<sub>2</sub>; (b) A scatter plot of in plume nHCHO vs. CO<sub>2</sub> for the 12 plumes. The slight decreased nHCHO at higher CO<sub>2</sub> concentrations can be due to the general increased nHCHO and decreased CO<sub>2</sub> trends with physical age. The CO<sub>2</sub> concentrations for each plume are provided in Figure S7.

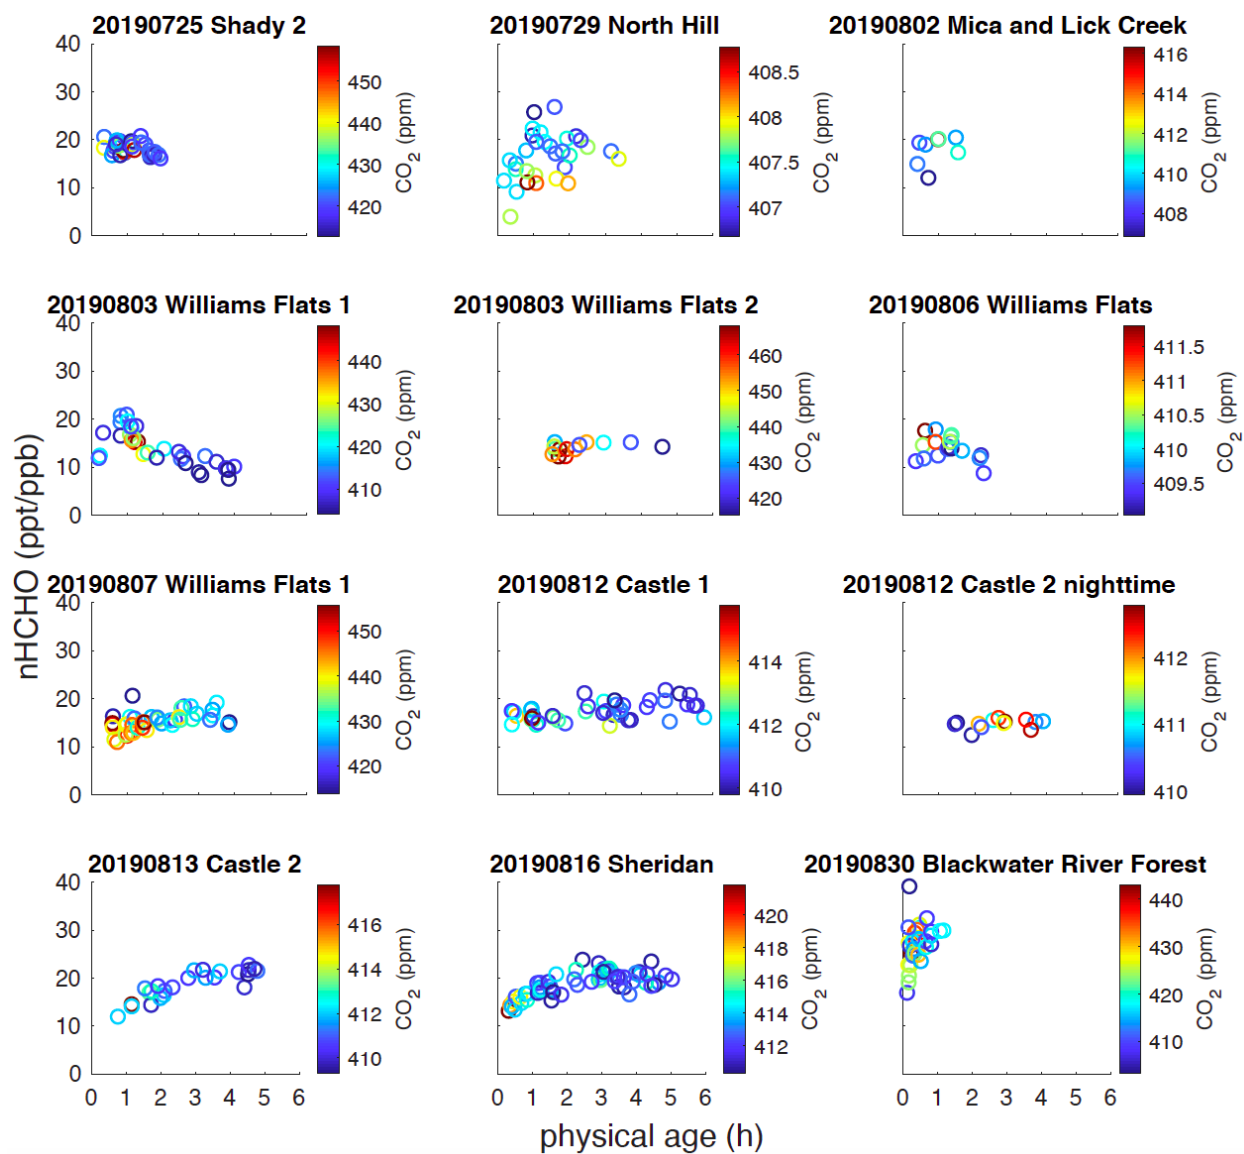

Figure S7. Trends of nHCHO for the 12 plumes analyzed color-coded by CO<sub>2</sub> concentrations, the variability of which is used as an approximation of FRP variability.

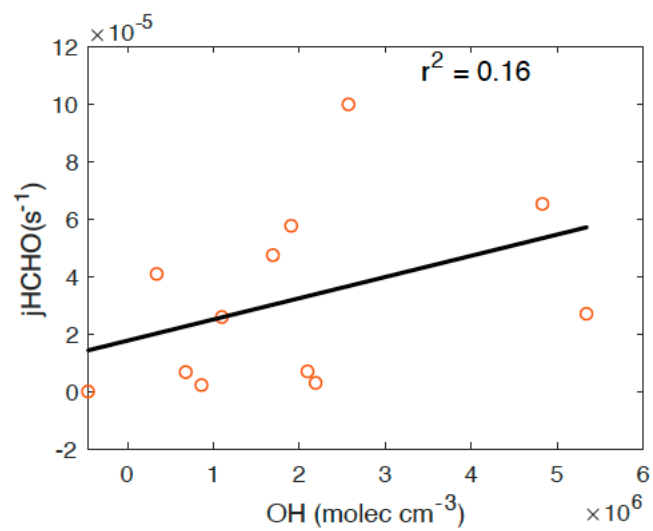

Figure S8 A scatter plot of photolysis rate of HCHO vs. average OH concentrations.
